# Supplementary material for: Research on Interface Bonding Properties of TiAlSiN/WC-Co Doped with Graphene
Source: MDPI journal article supplement (doi:10.3390/mi14020431), 2023-02-11
Supplement: s1 [file s1]

Article

# Research on Interface Bonding Properties of TiAlSiN/WC-Co Doped with Graphene

Junru Yang <sup>\*</sup>, Yan Wang, Hao Lv, Yanping Yue, Shulei Li and Ran Zhu

College of Mechanical and Electronic Engineering, Shandong University of Science and Technology, Qingdao 266590, China

<sup>\*</sup> Correspondence: yangjunru@sdust.edu.cn

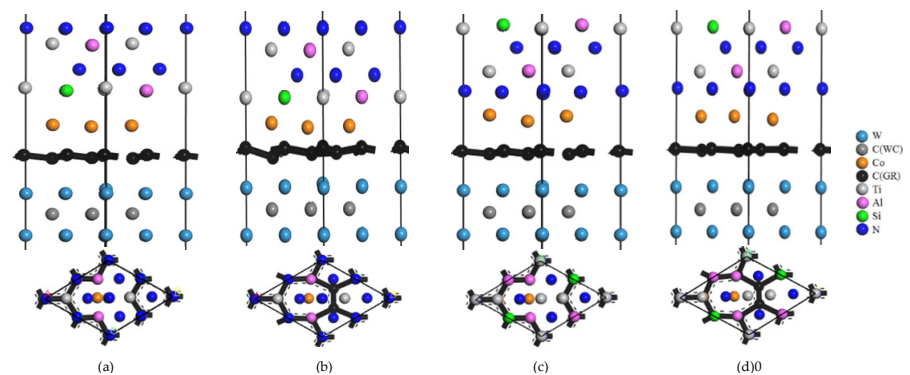

**Figure S1.** Interface models of matrix doped with defective graphene: (a) TiAlSiN<sub>Si</sub>/WC/svGR/Co; (b) TiAlSiN<sub>Si</sub>/WC/tdGR/Co; (c) TiAlSiN<sub>N</sub>/WC/svGR/Co; (d) TiAlSiN<sub>N</sub>/WC/tdGR/Co.

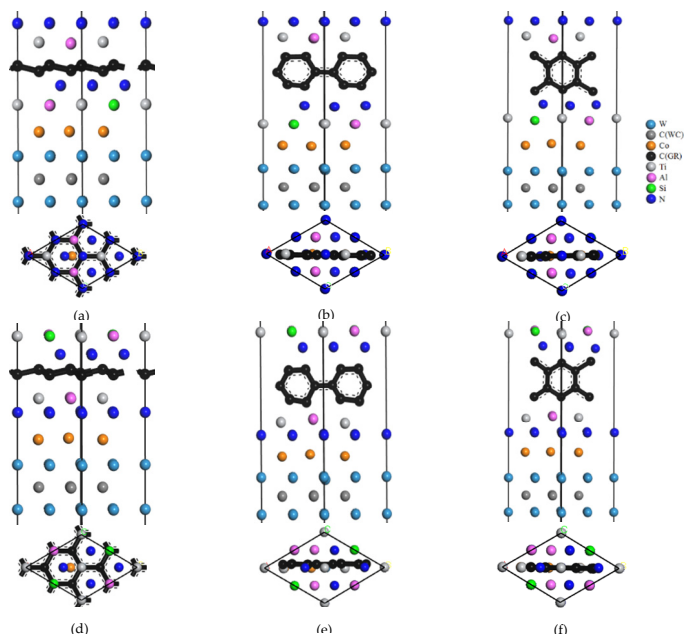

**Figure S2.** Interface models of coating doped with intrinsic graphene: (a) TiAlSiN/msGR/TiAlSiN<sub>Si</sub>/WC-Co; (b) TiAlSiN/acGR/TiAlSiN<sub>Si</sub>/WC-Co; (c) TiAlSiN/zzGR/TiAlSiN<sub>Si</sub>/WC-Co; (d) TiAlSiN/msGR/TiAlSiN<sub>N</sub>/WC-Co; (e) TiAlSiN/acGR/TiAlSiN<sub>N</sub>/WC-Co; (f) TiAlSiN/zzGR/TiAlSiN<sub>N</sub>/WC-Co.

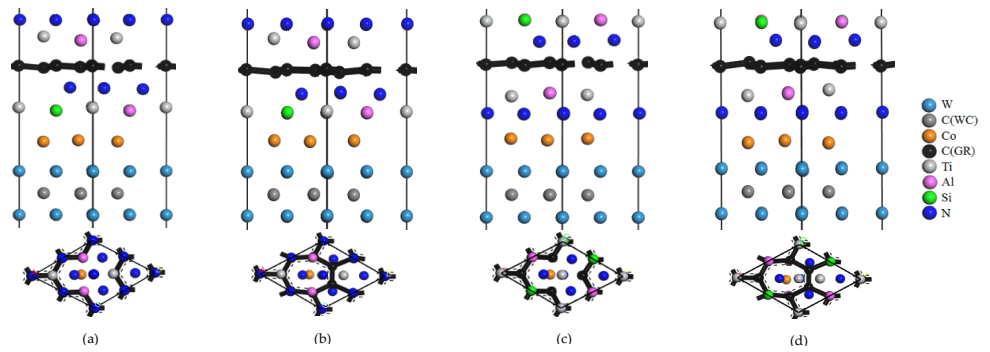

**Figure S3.** Interface models of coating doped with defective graphene: (a) TiAlSiN/svGR/TiAlSiN<sub>Si</sub>/WC-Co; (b) TiAlSiN/tdGR/TiAlSiN<sub>Si</sub>/WC-Co; (c) TiAlSiN/svGR/TiAlSiN<sub>N</sub>/WC-Co; (d) TiAlSiN/tdGR/TiAlSiN<sub>N</sub>/WC-Co.

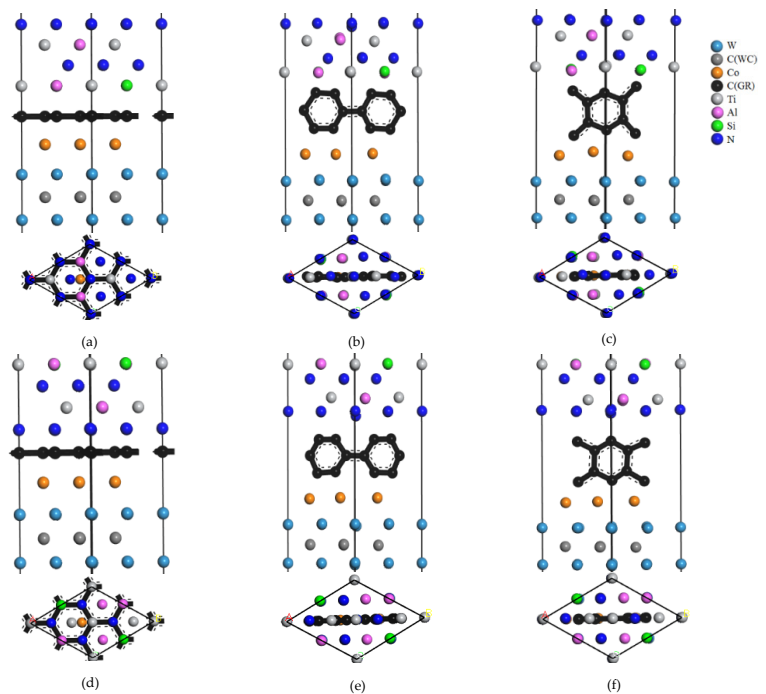

**Figure S4.** Interface models of coating/matrix interface doped with intrinsic graphene: (a) TiAlSiN<sub>Si</sub>/msGR/WC-Co; (b) TiAlSiN<sub>Si</sub>/acGR/WC-Co; (c) TiAlSiN<sub>Si</sub>/zzGR/WC-Co; (d) TiAlSiN<sub>N</sub>/msGR/WC-Co; (e) TiAlSiN<sub>N</sub>/acGR/WC-Co; (f) TiAlSiN<sub>N</sub>/zzGR/WC-Co.

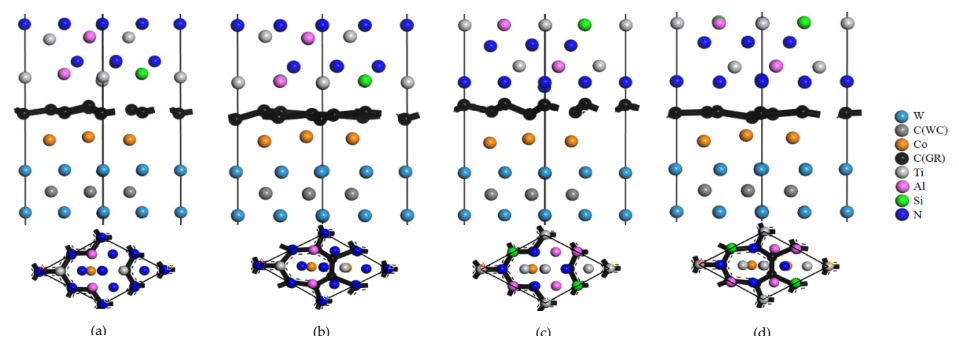

**Figure S5.** Interface models of coating/matrix interface doped with defective graphene: (a) TiAlSiN<sub>Si</sub>/svGR/WC-Co; (b) TiAlSiN<sub>Si</sub>/tdGR/WC-Co; (c) TiAlSiN<sub>N</sub>/svGR/WC-Co; (d) TiAlSiN<sub>N</sub>/tdGR/WC-Co.
